# Supplementary material for: Characterisation of putative lactate synthetic pathways of Coxiella burnetii
Source: PubMed Central journal article supplement (PMC8362950; doi:10.1371/journal.pone.0255925), 2021-08-13
Supplement: pone.0255925.s001.pdf [file pone.0255925.s001.pdf]

**S1 Fig. Protein sequence alignments of representative (A) MDHs and LDHs including CBU1241, and (B) MEs and MLEs including CBU0823.**

The pertinent accession numbers are provided in parentheses. Residues in sequences sharing identity with consensus are highlighted.
